# Supplementary figures and images for: Global Transcriptome and Co-Expression Network Analysis Reveal Contrasting Response of Japonica and Indica Rice Cultivar to γ Radiation
Source: MDPI journal article supplement (doi:10.3390/ijms20184358), 2019-09-05

A

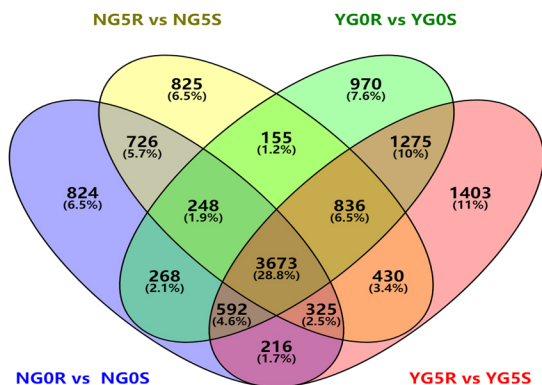

B

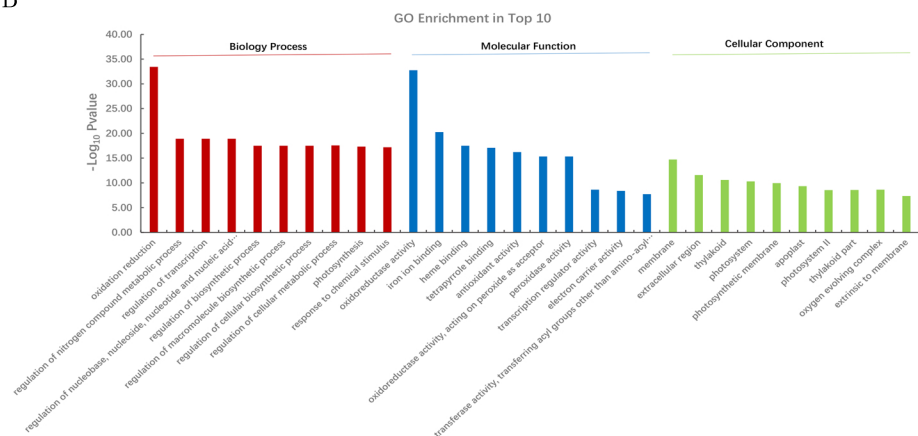

C

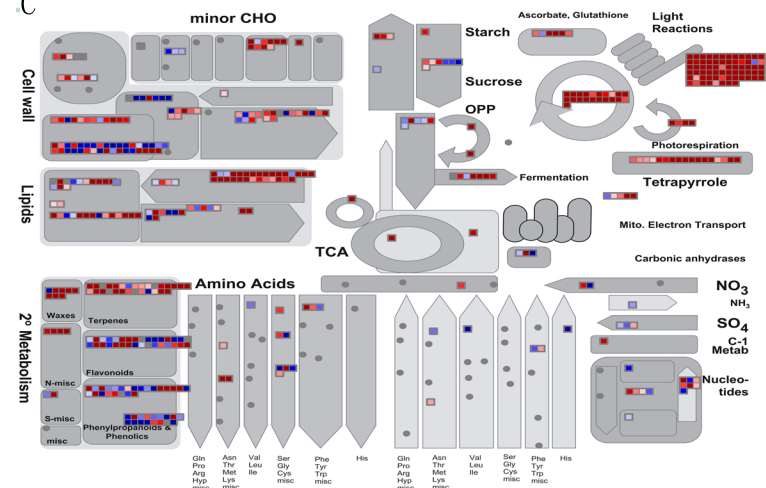

D

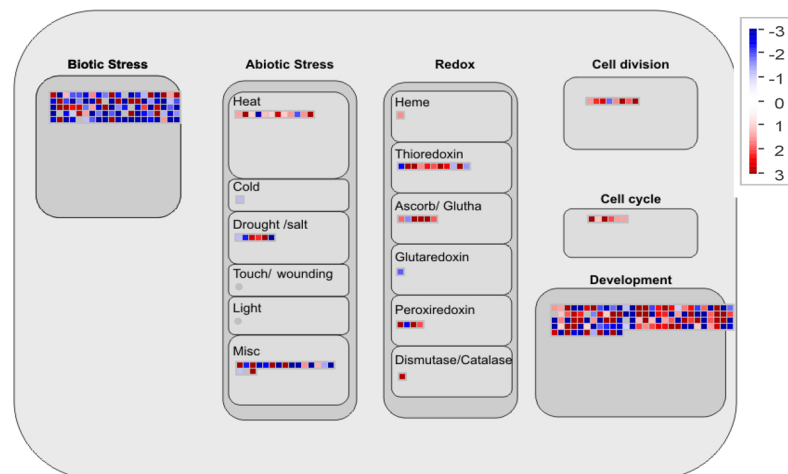

E

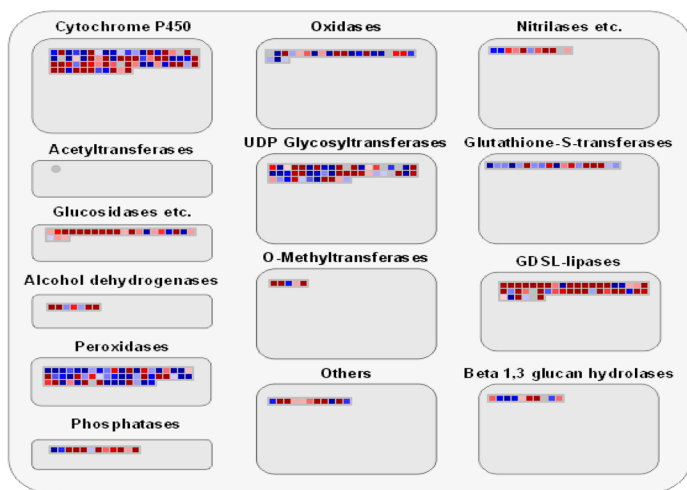

F

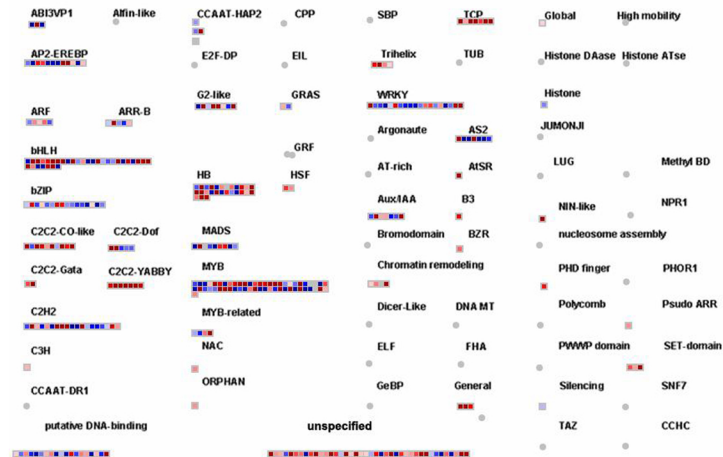

Supplement: s1 [file s1]

A

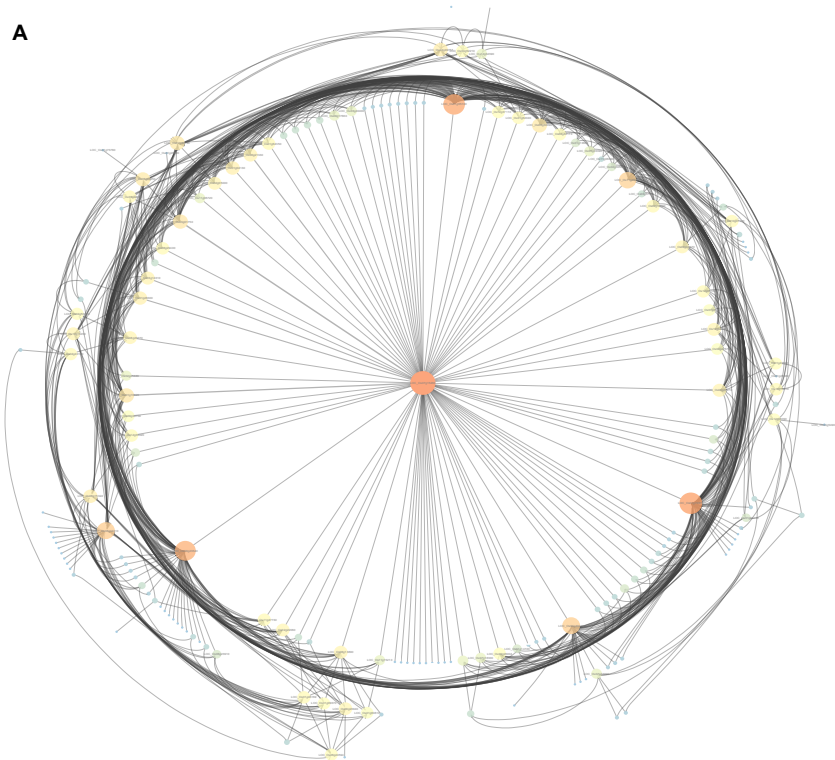

B

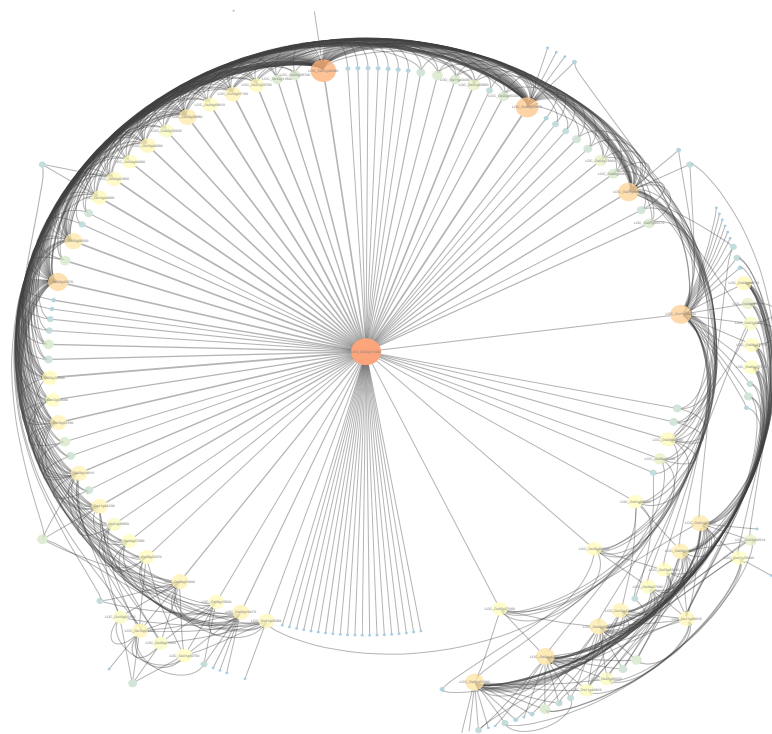

C

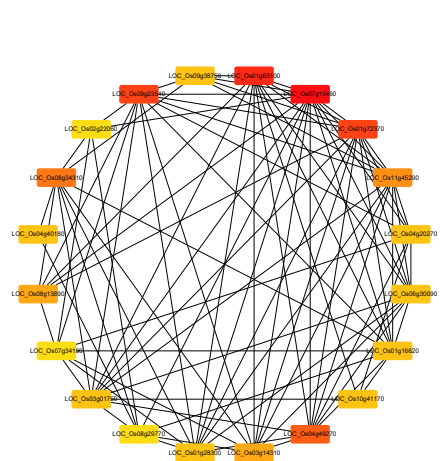

Top 20 nodes

D

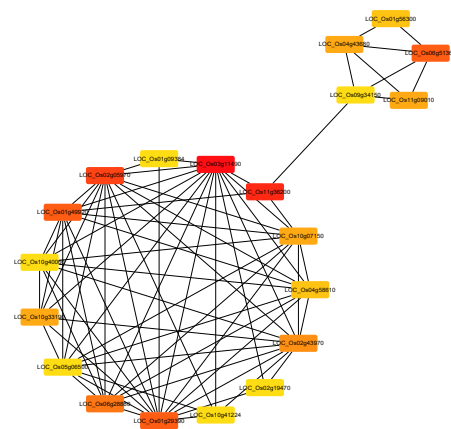

Top 20 nodes

Supplement: s1 [file s1]

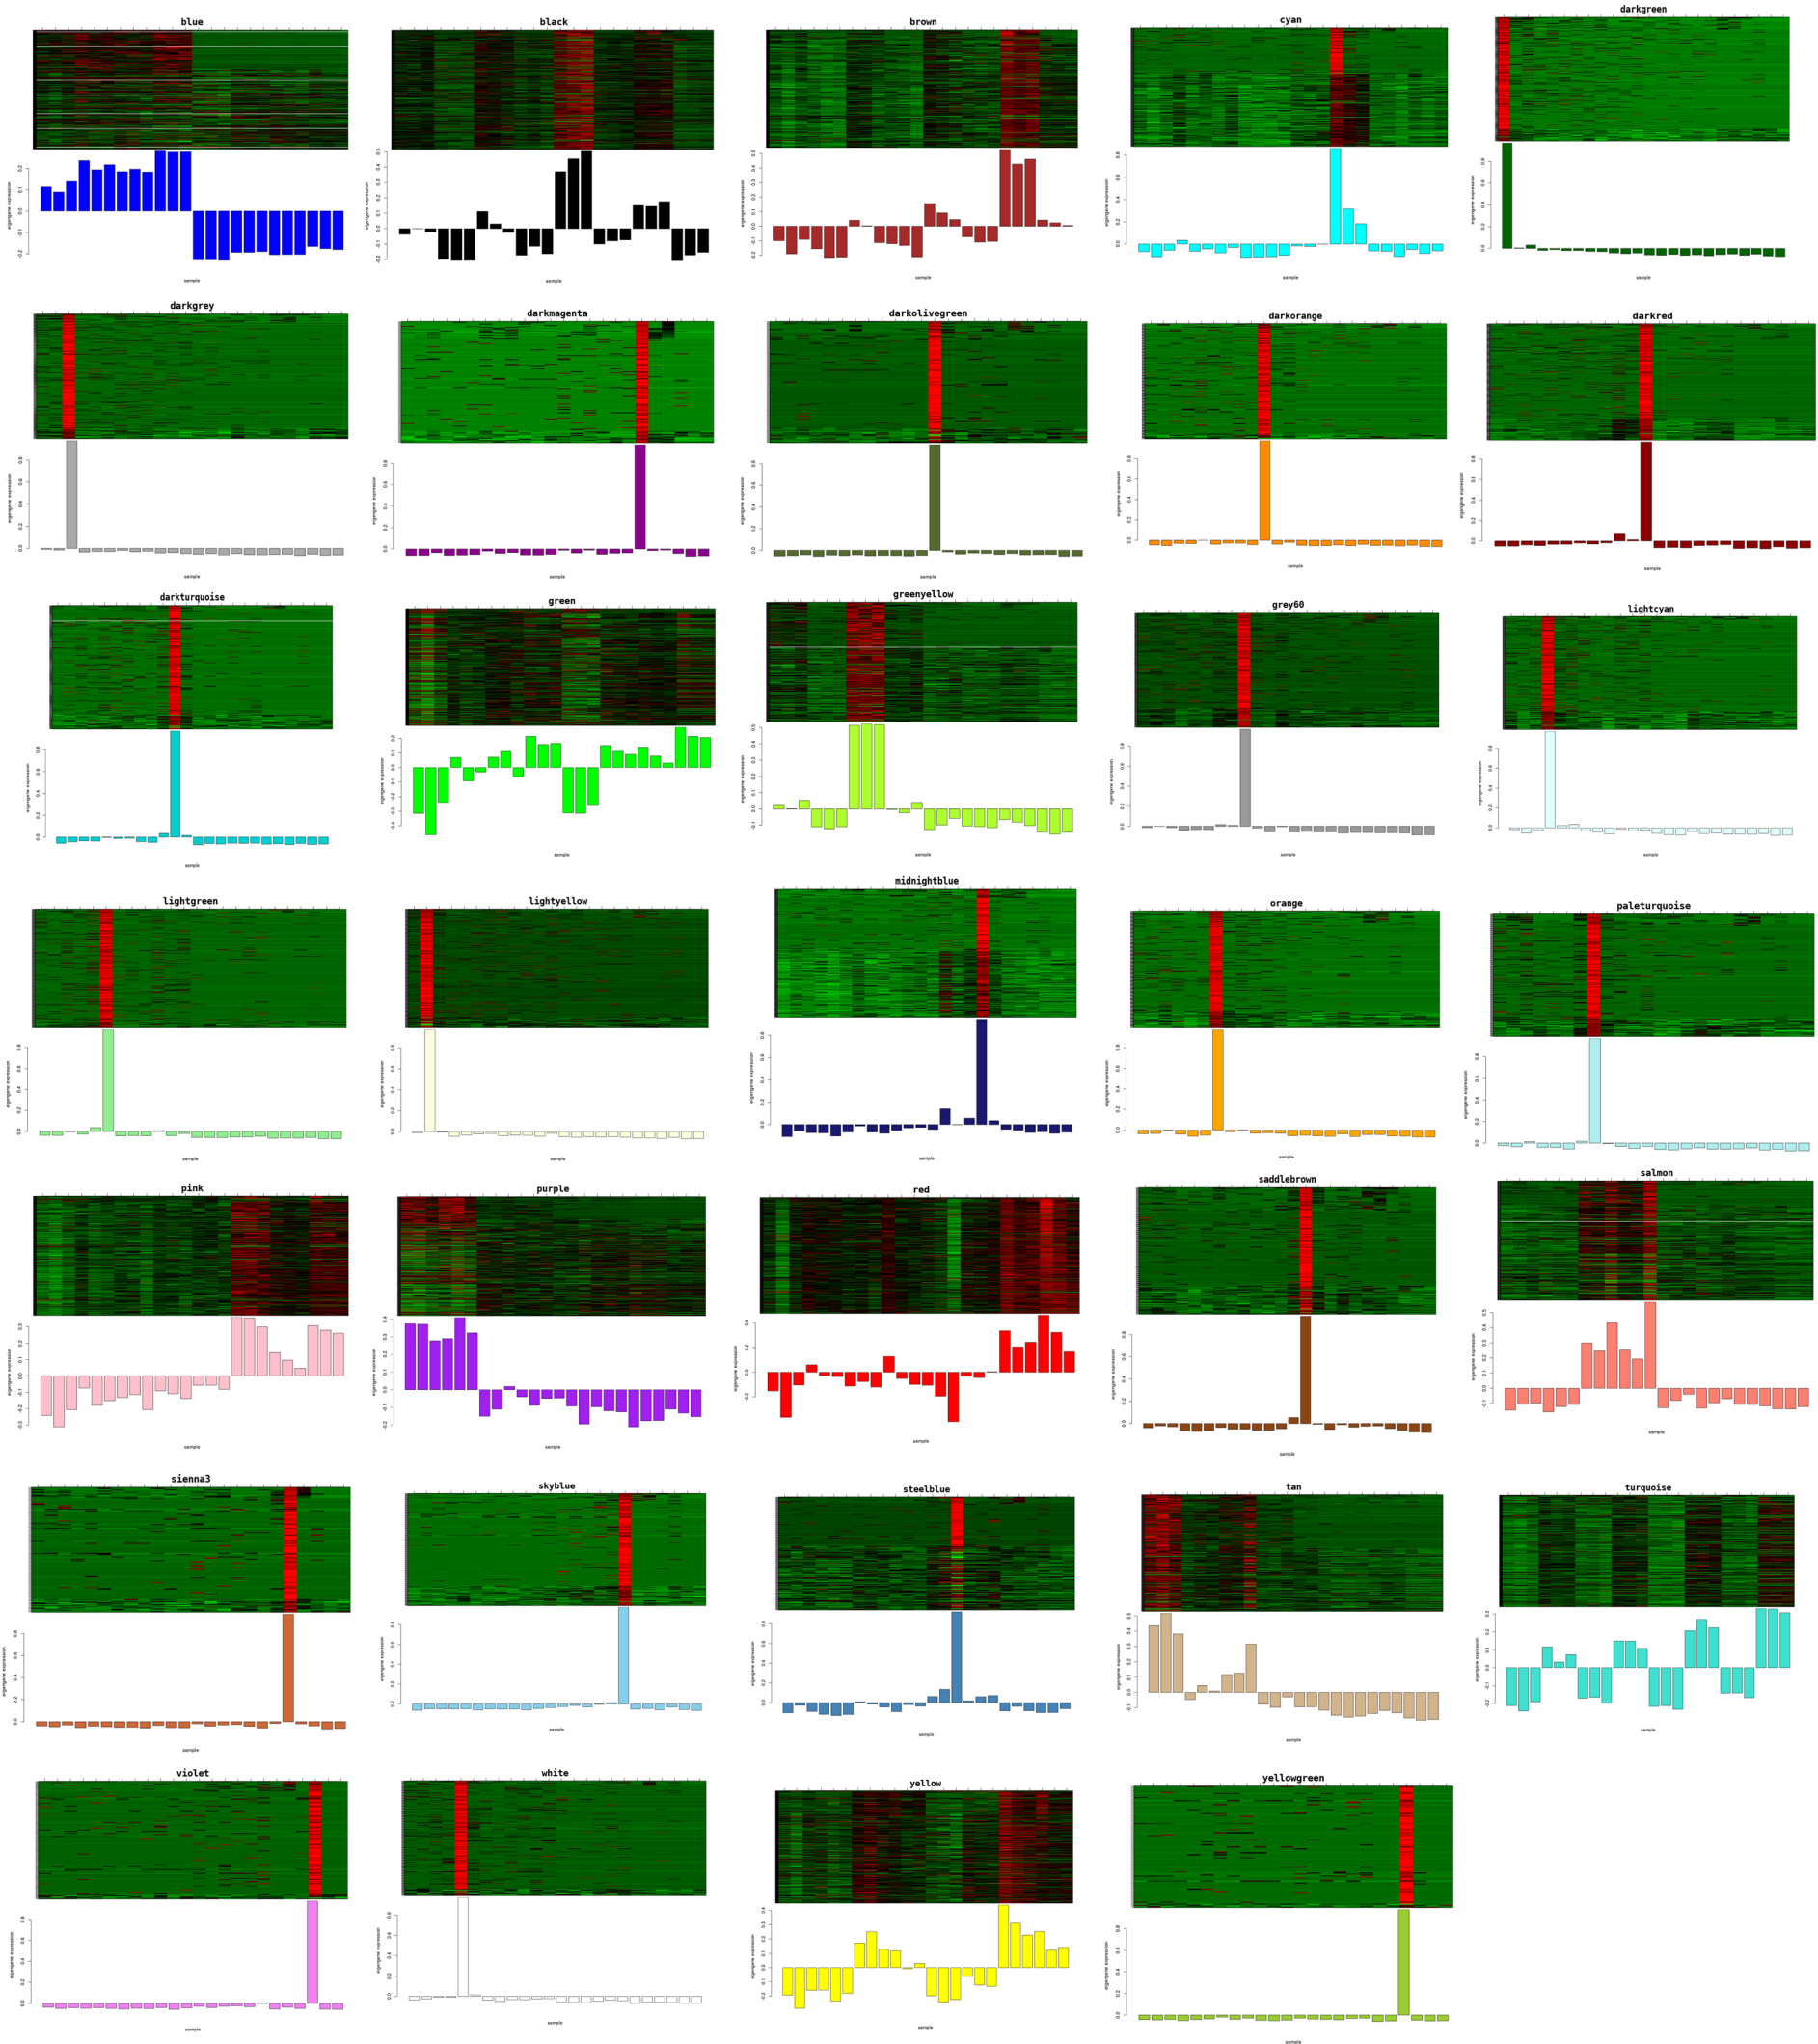

Supplement: s1 [file s1]

A

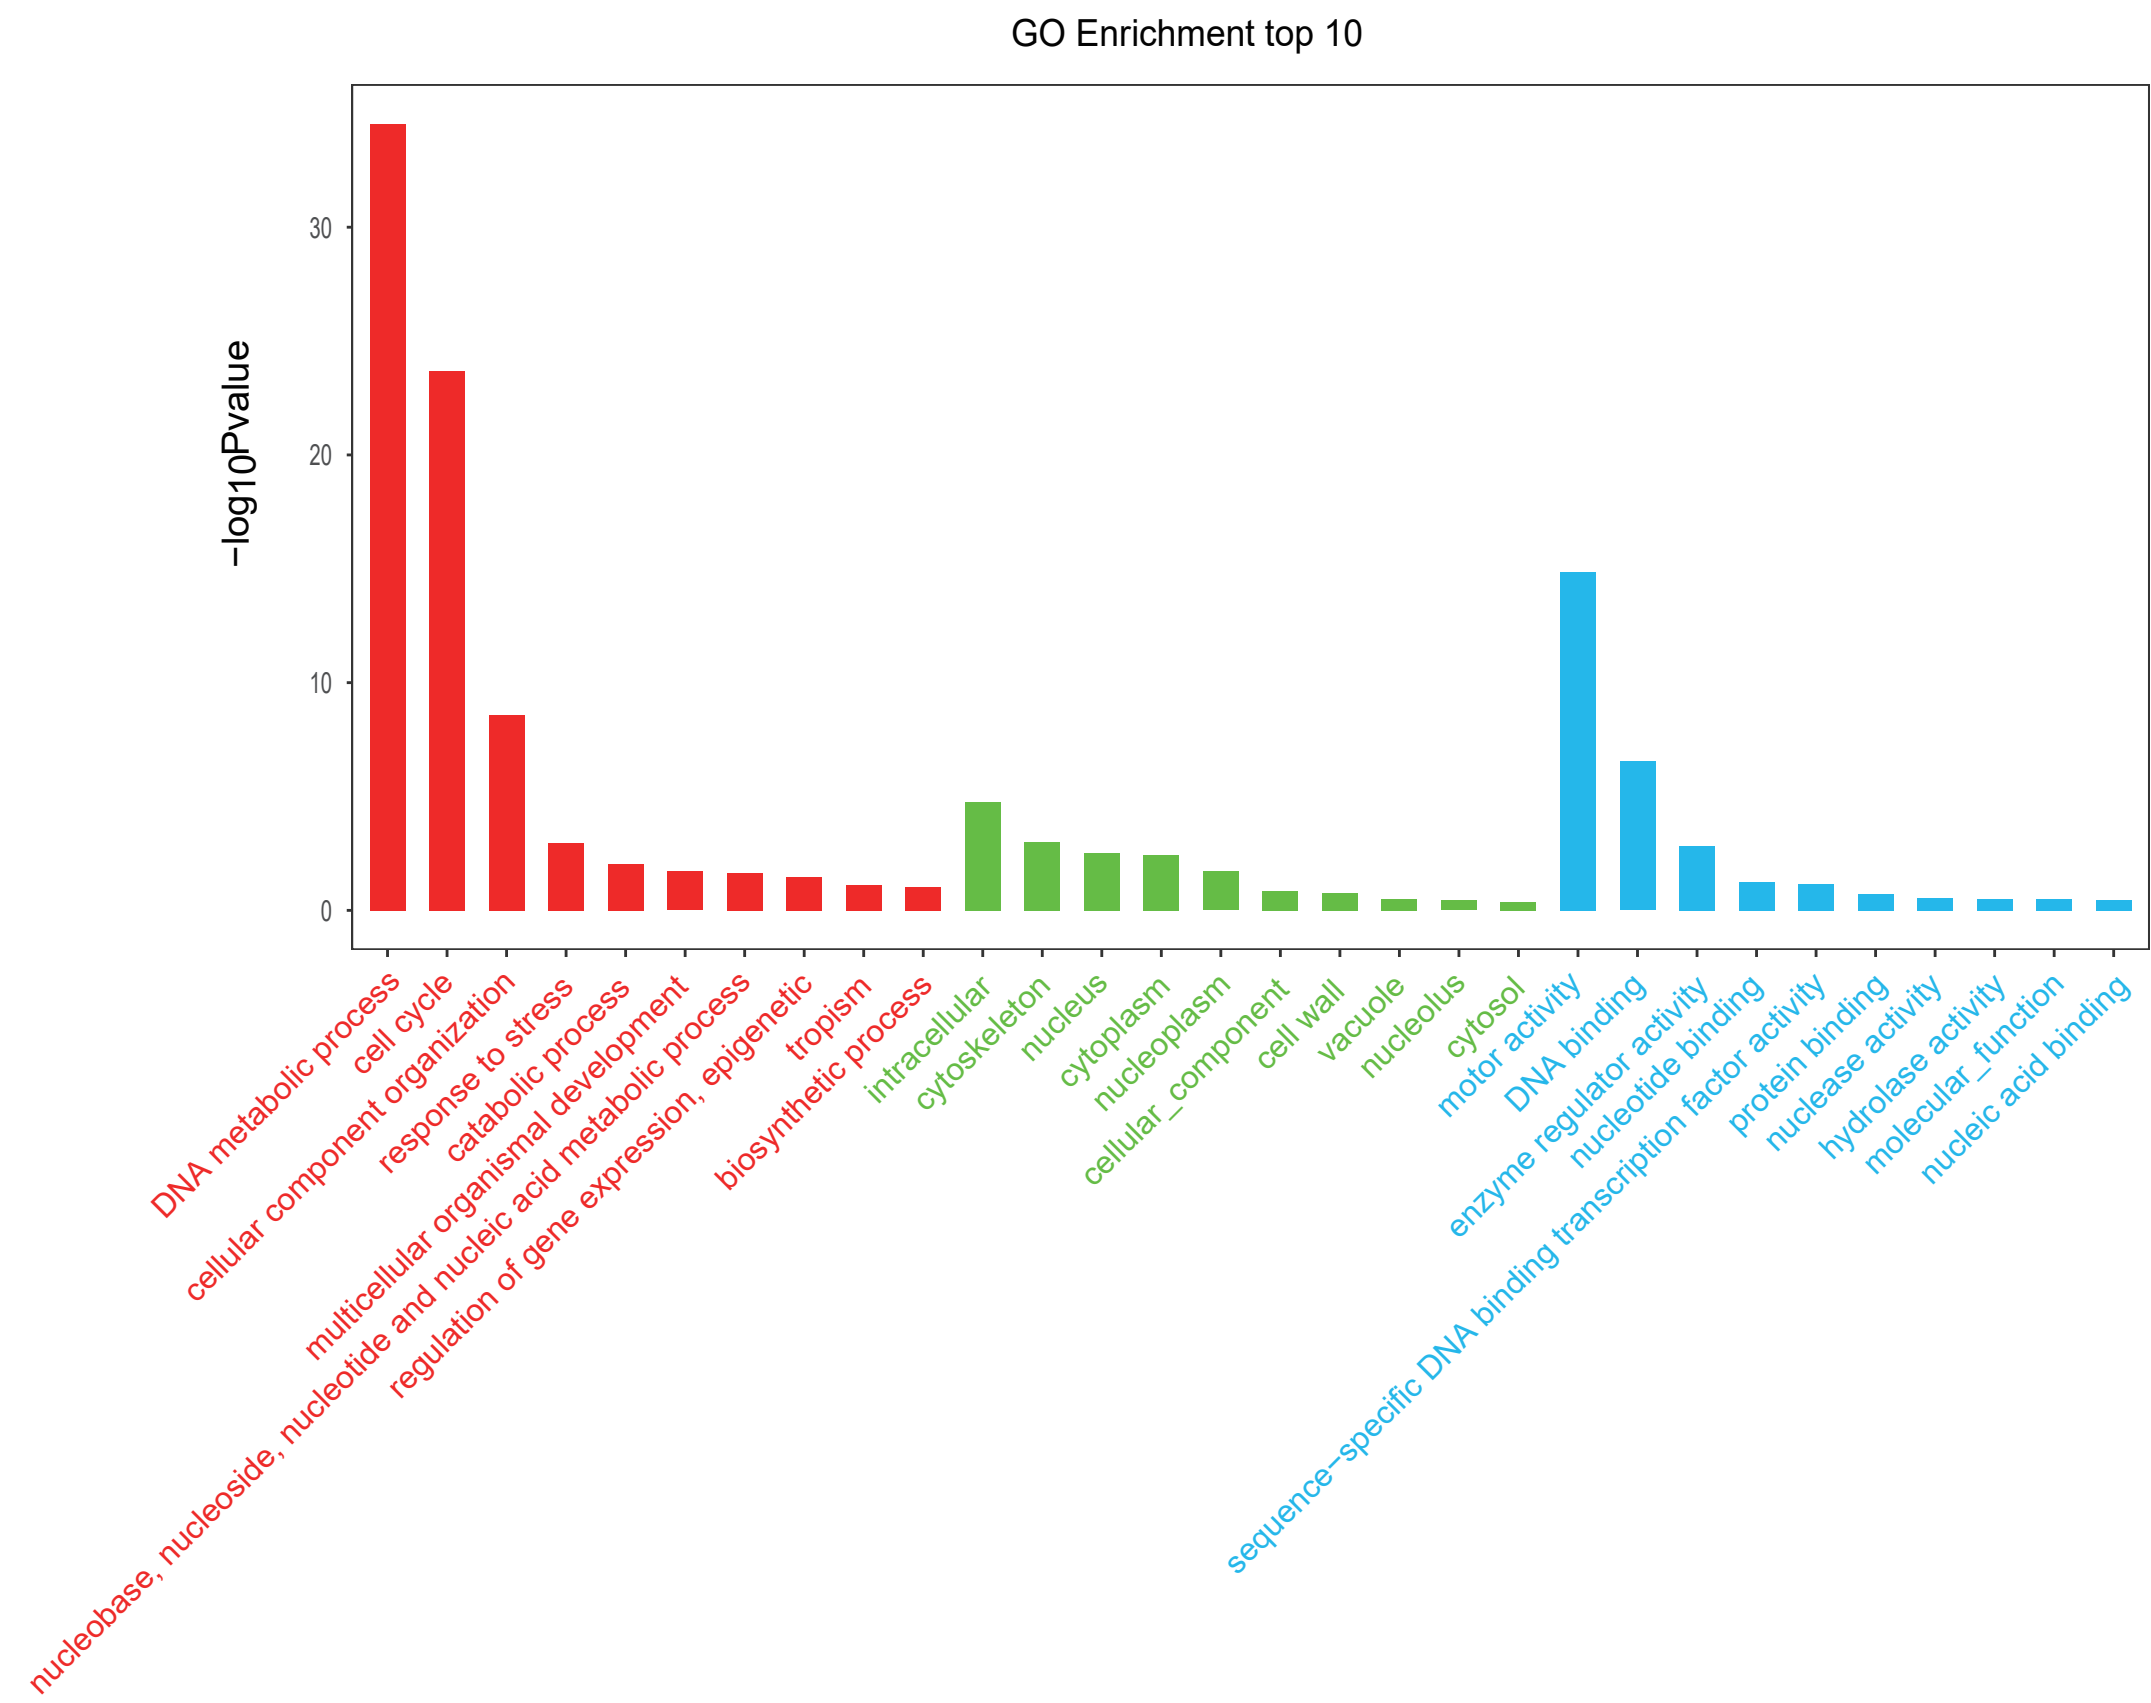

B

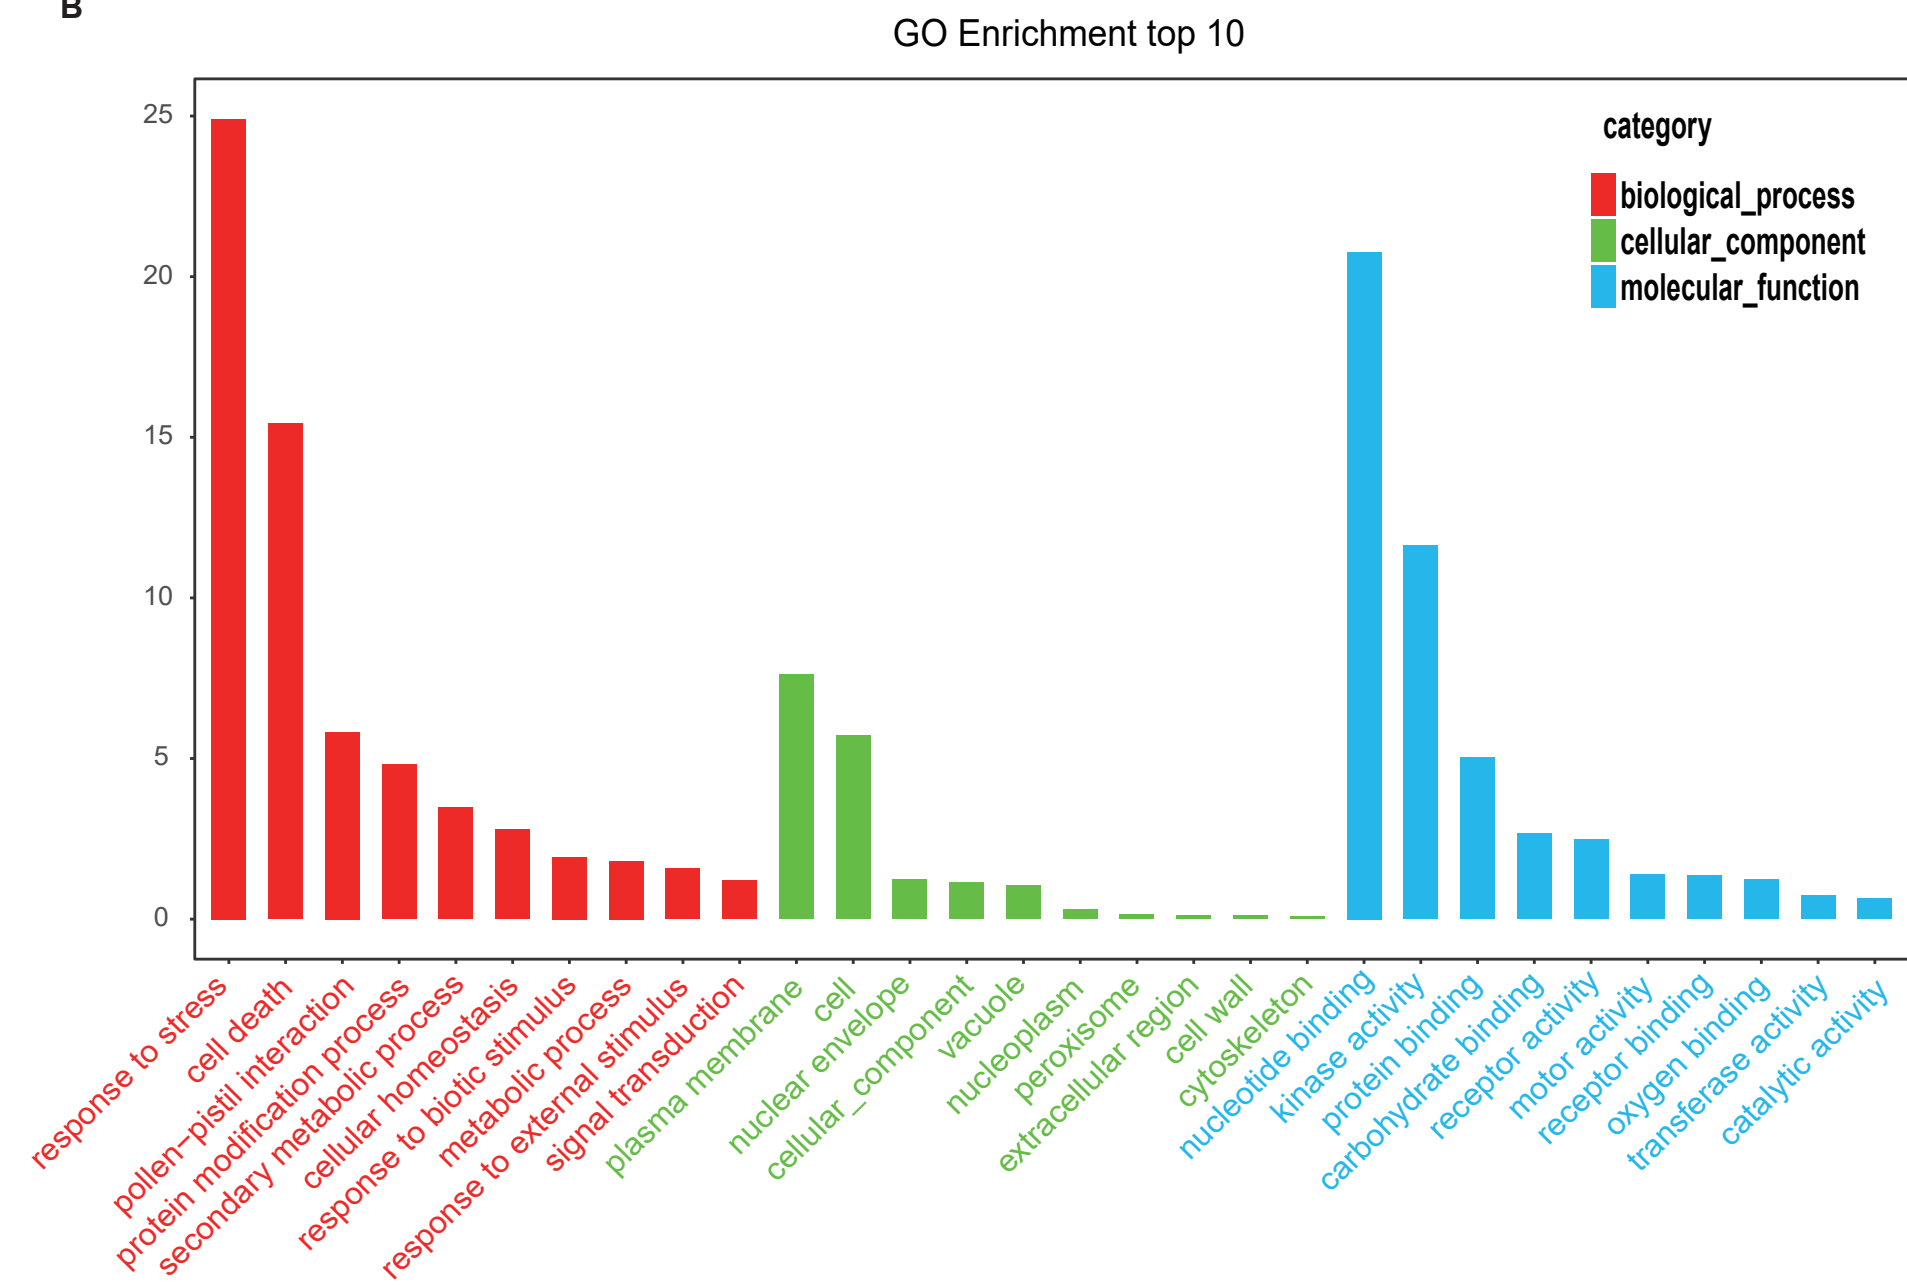

C

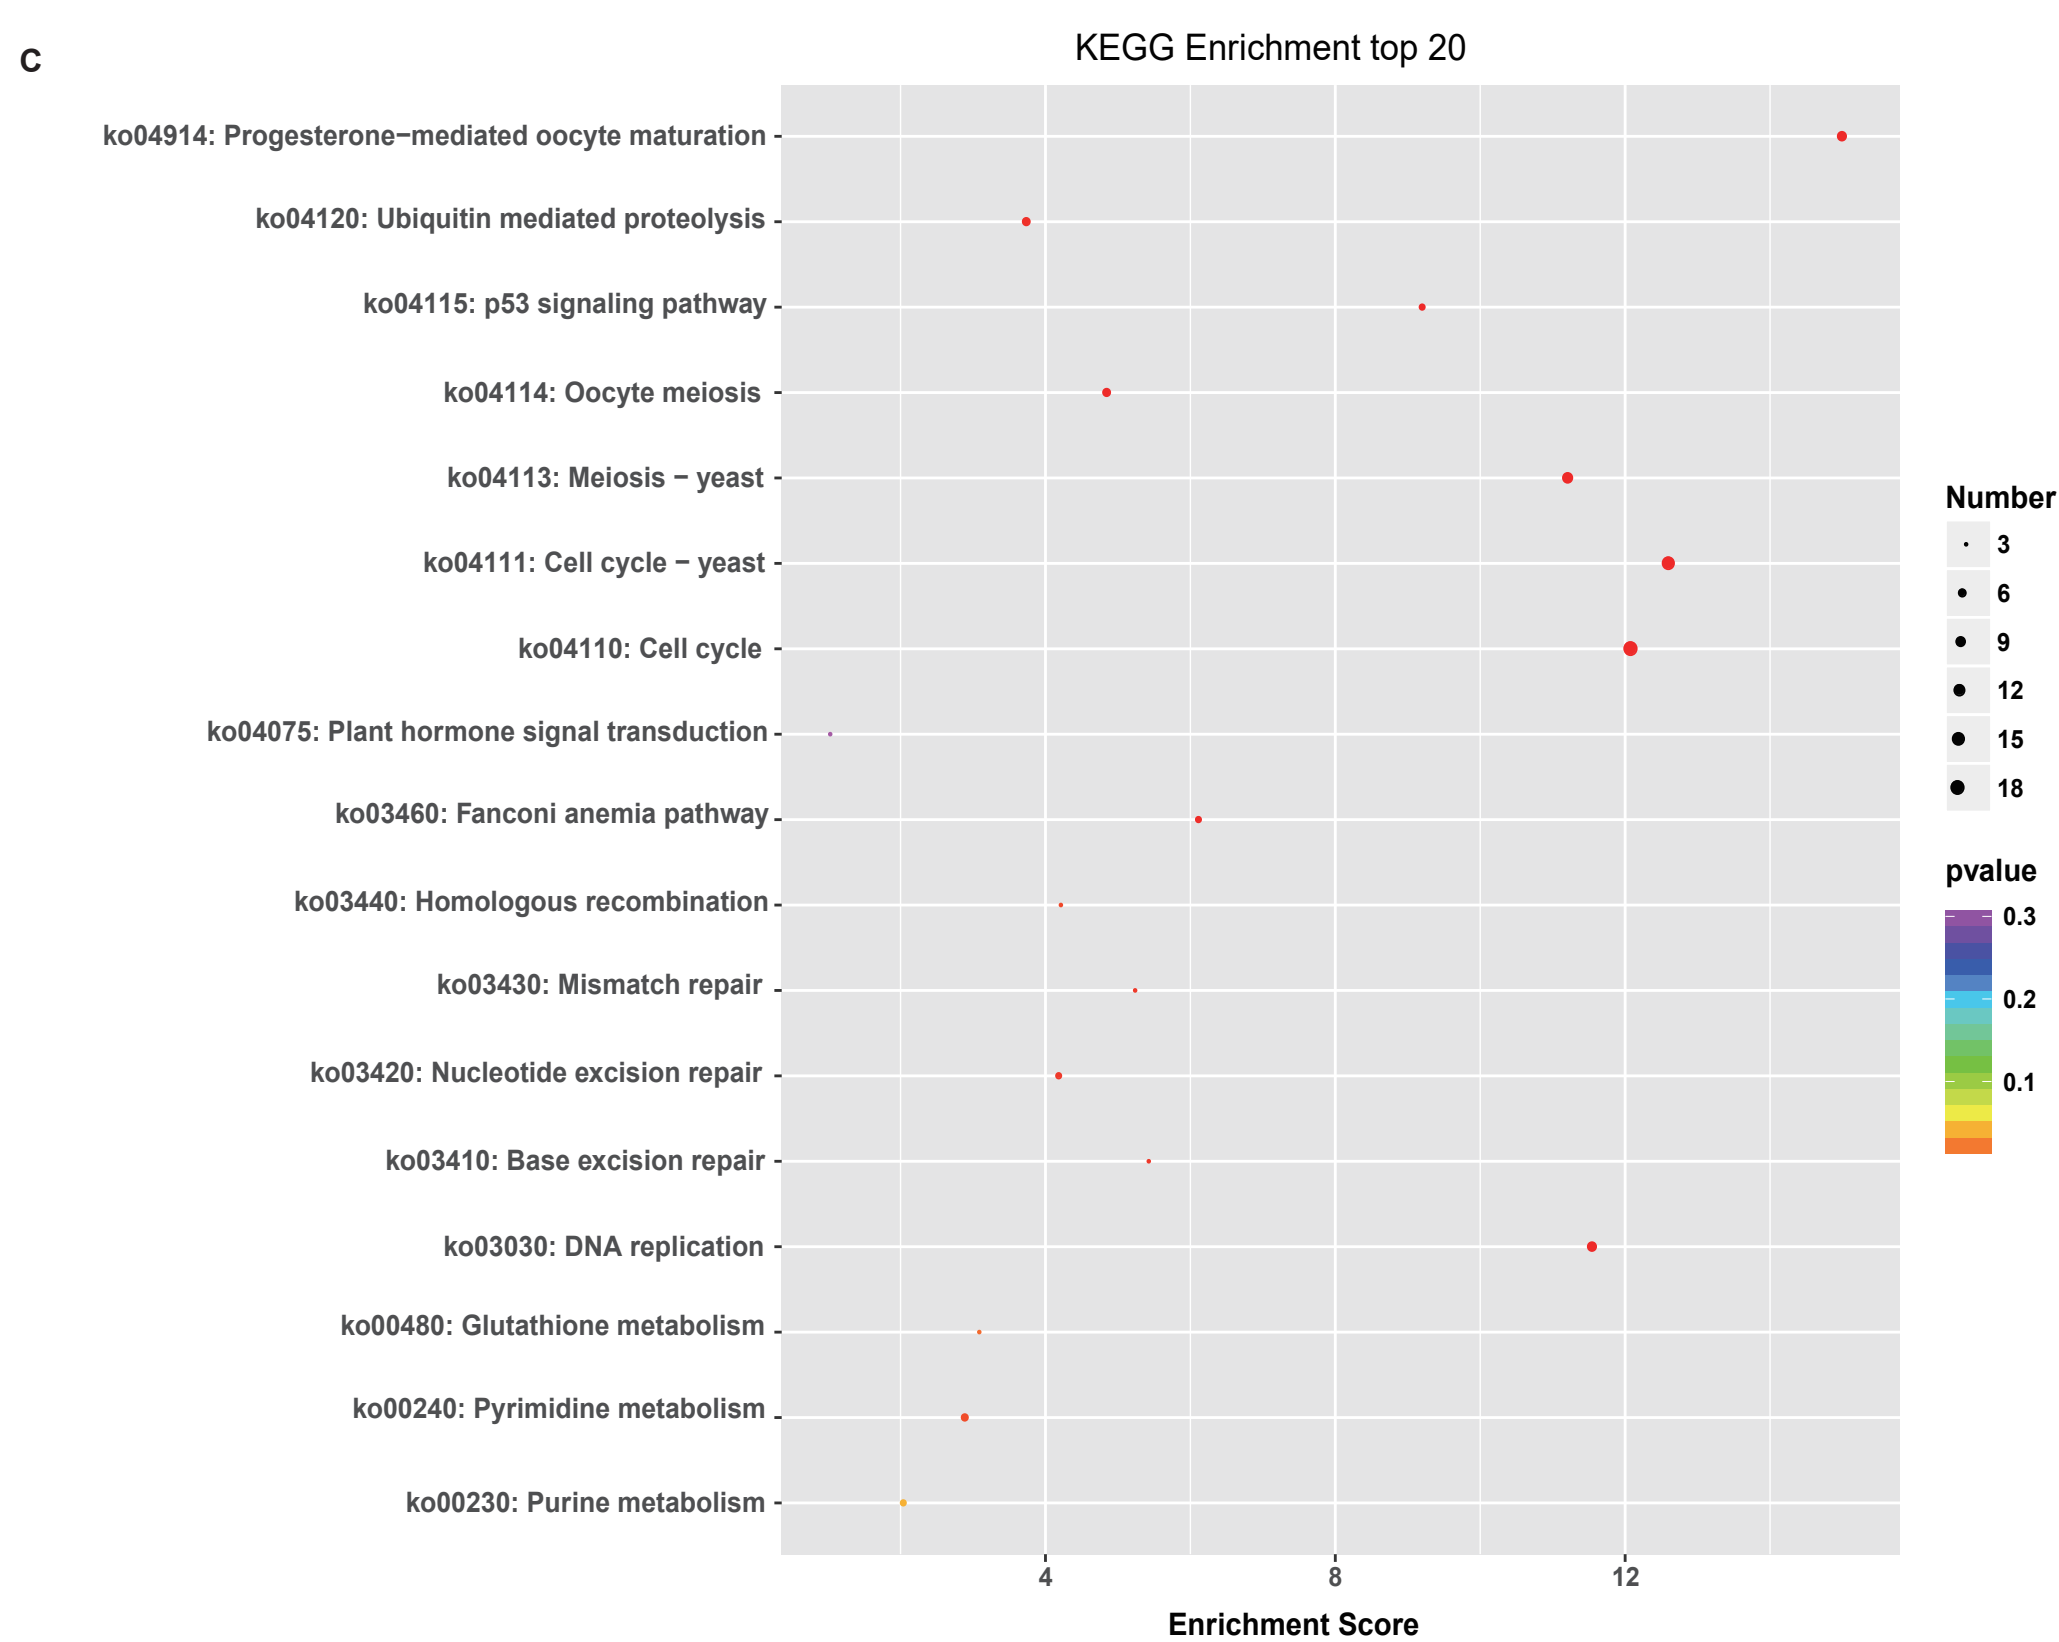

D

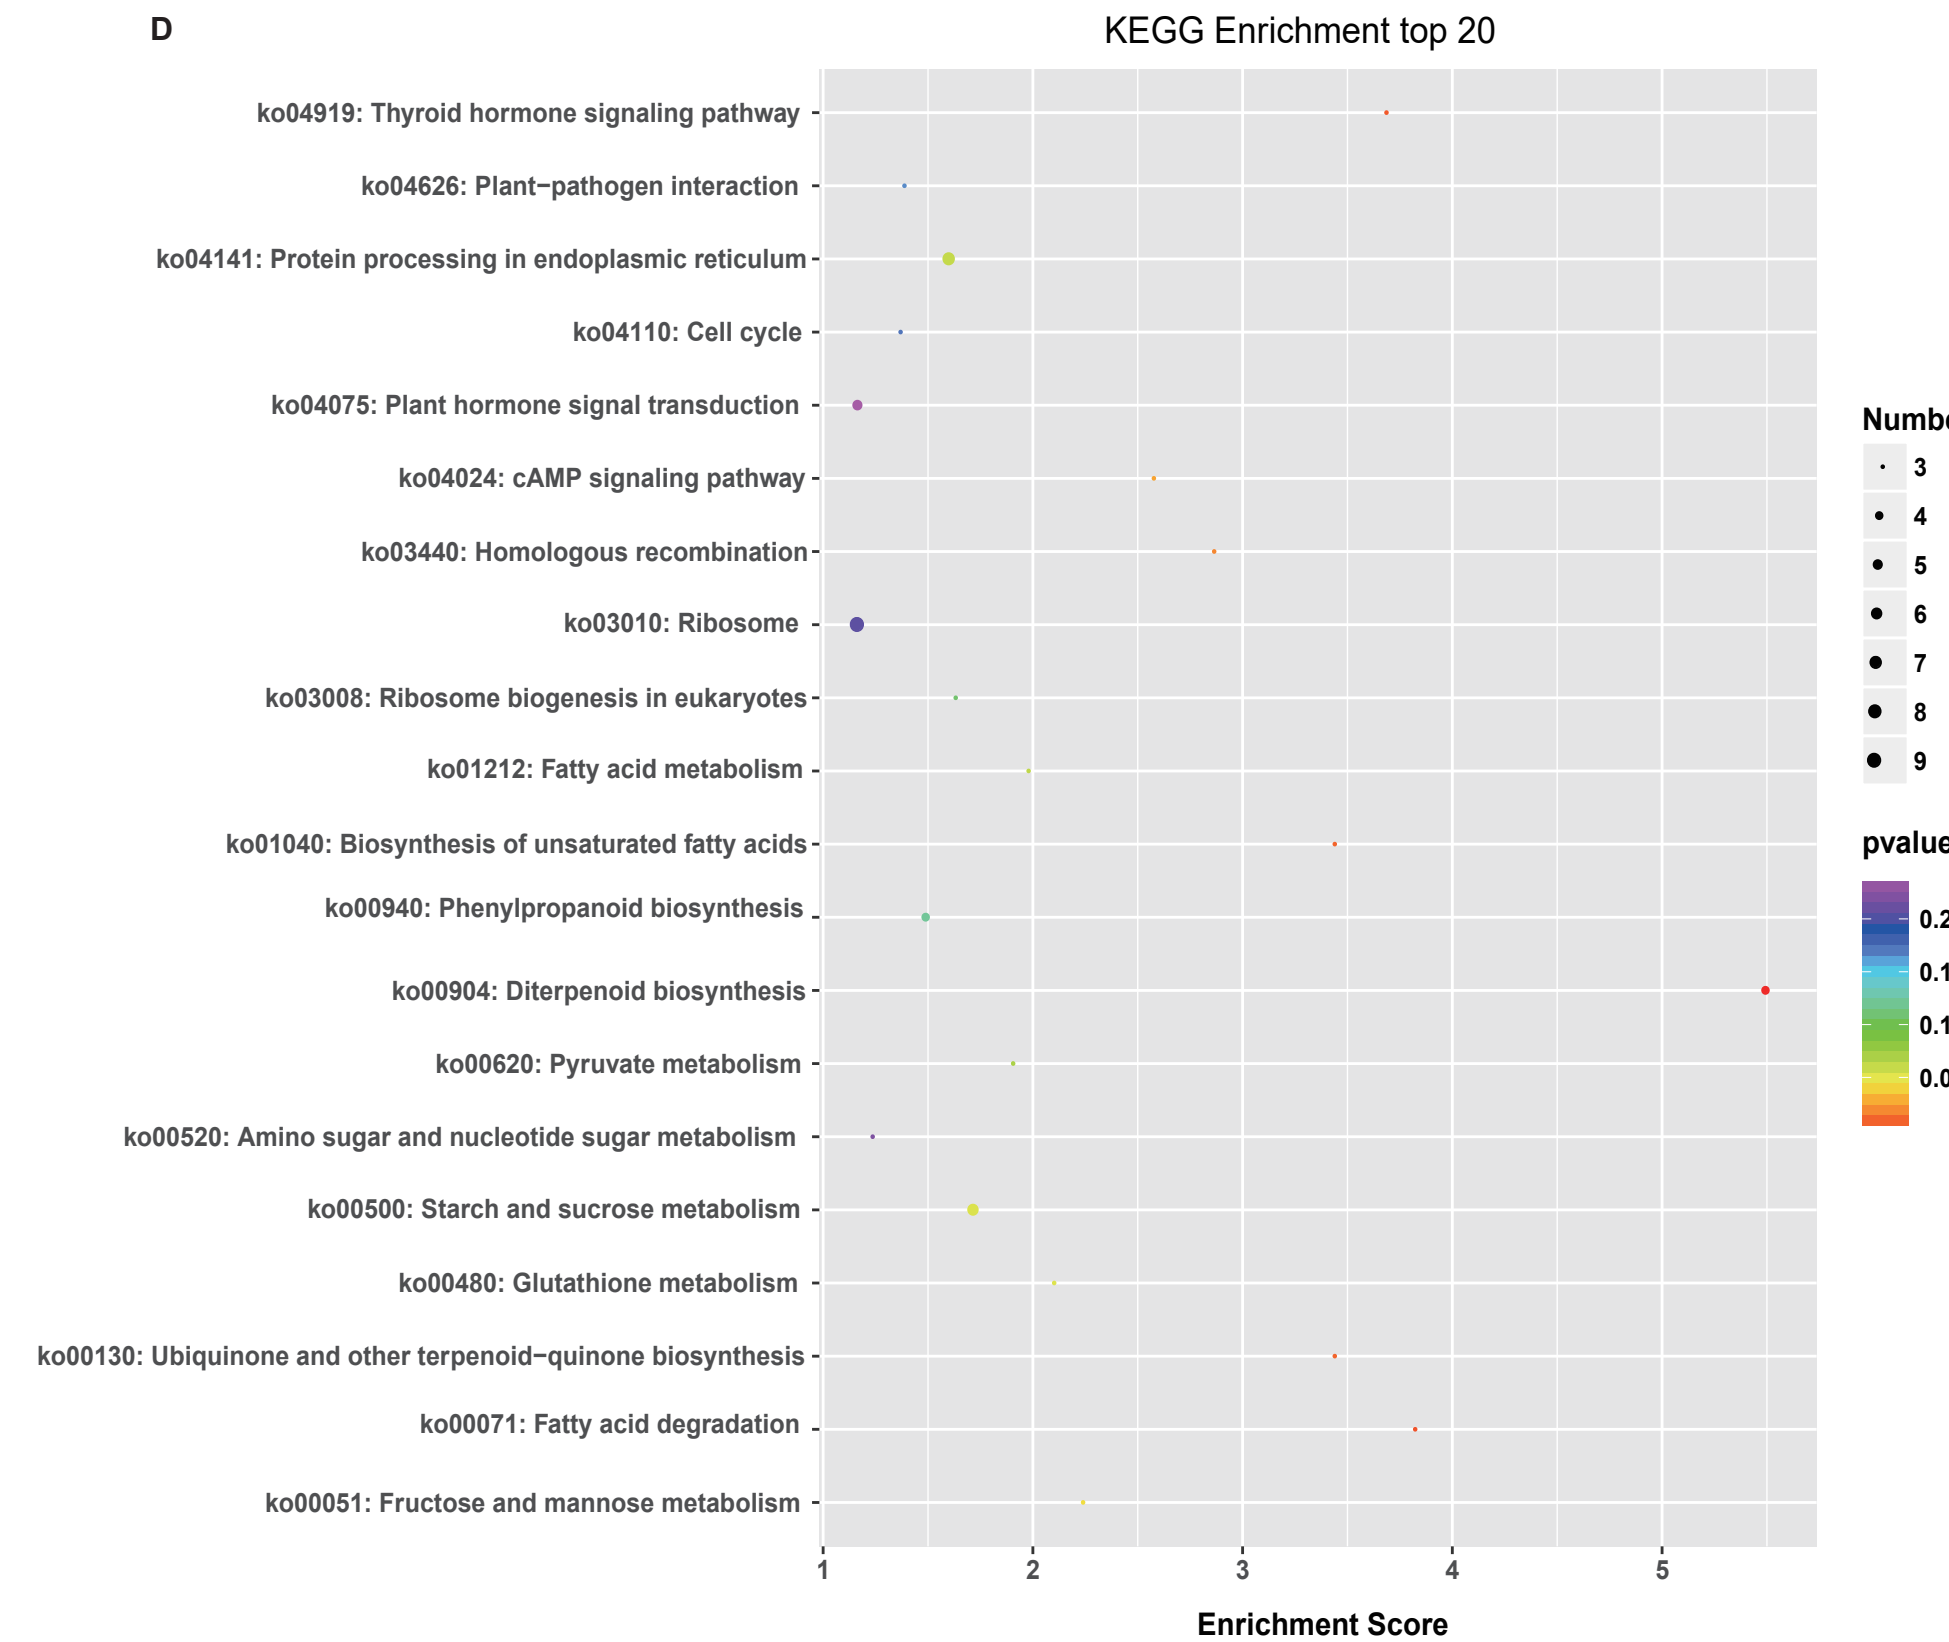

Supplement: s1 [file s1]

A

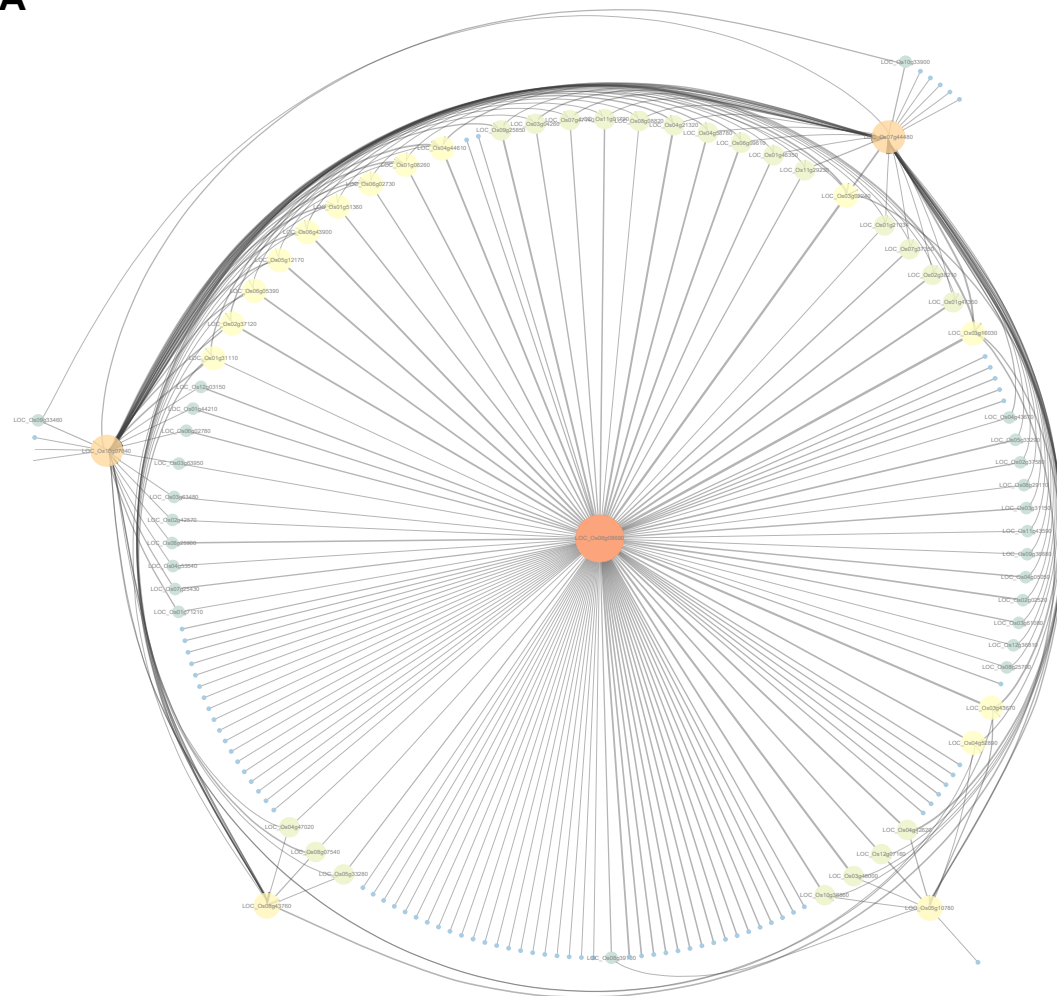

B

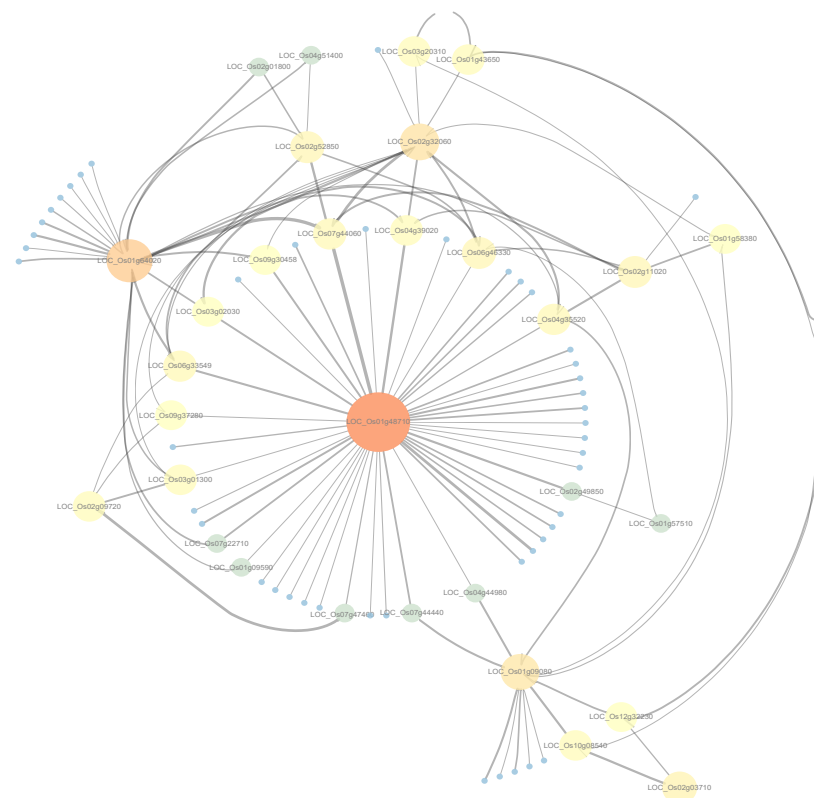

C

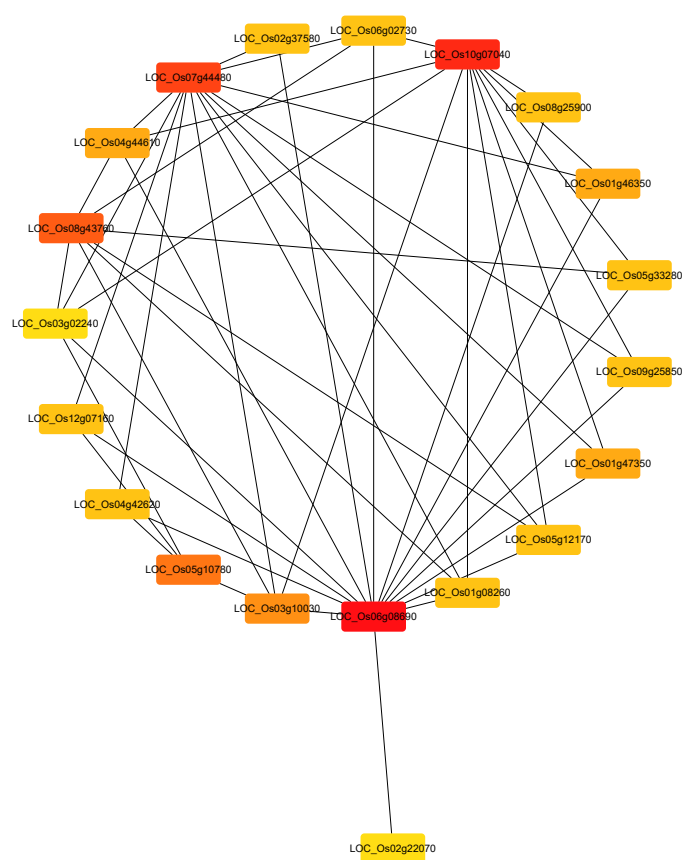

Top 20 nodes

D

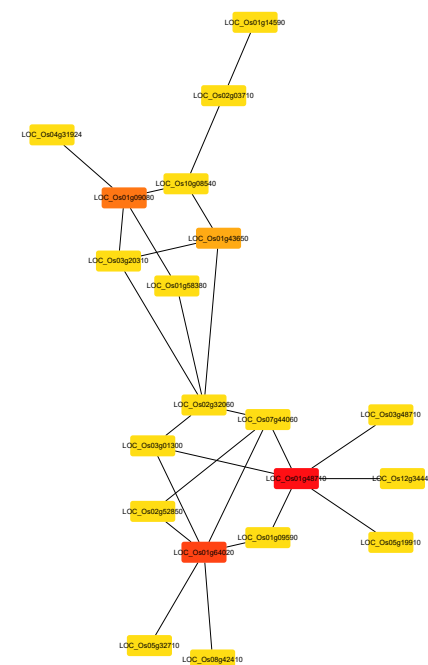

Top 20 nodes

Supplement: s1 [file s1]
